# Supplementary material for: Crystal Structure of the Heterotrimeric Integrin-Binding Region of Laminin-111
Source: PubMed Central journal article supplement (PMC5343747; doi:10.1016/j.str.2017.01.002), 2017-03-07
Supplement: mmc1.pdf [file mmc1.pdf]

**Structure, Volume 25**

**Supplemental Information**

**Crystal Structure of the Heterotrimeric  
Integrin-Binding Region of Laminin-111**

**David Pulido, Sadaf-Ahmahni Hussain, and Erhard Hohenester**

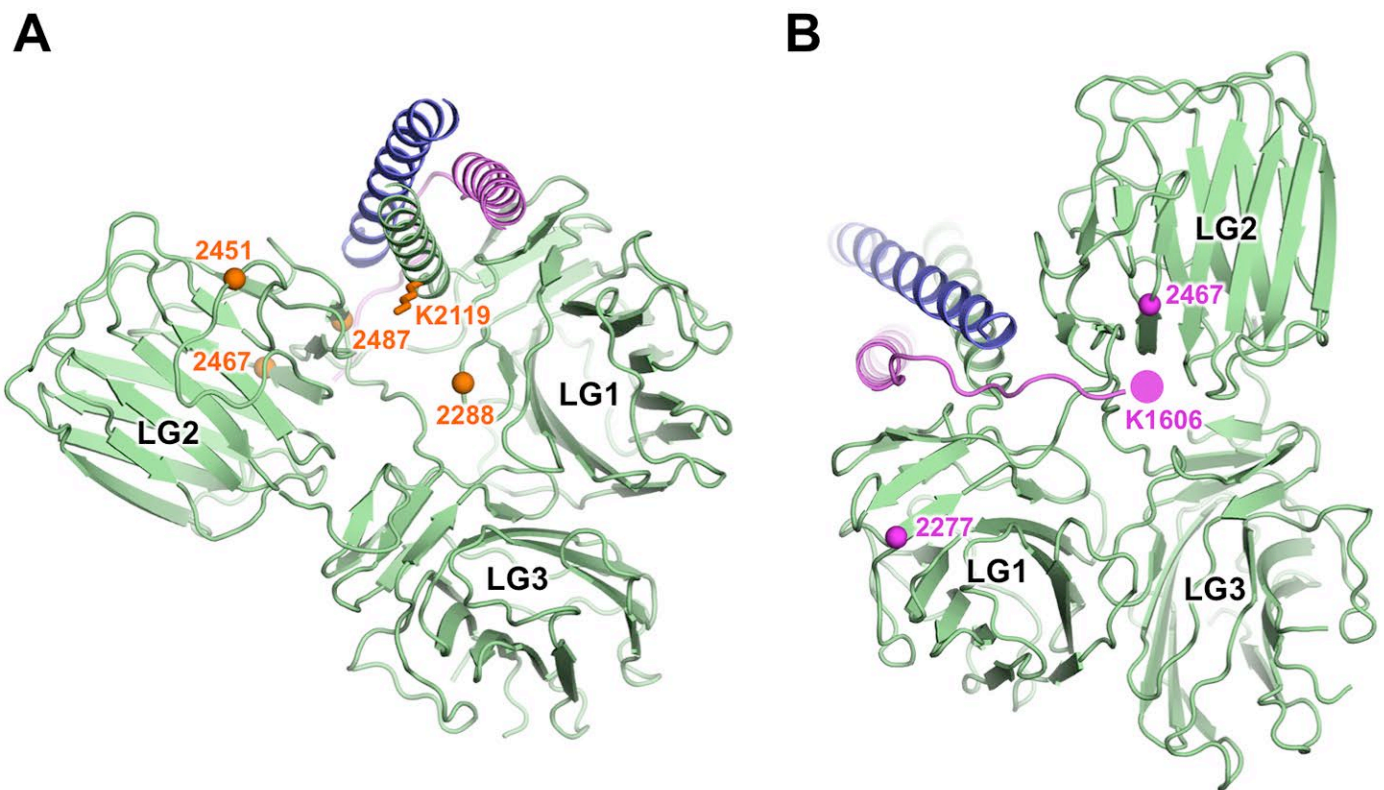

**Figure S1, related to Figure 1. Mapping of chemical cross-links onto the mini-E8 structure.** The cross-link data are from Armony et al. (2016). **(A)** Cross-links within the laminin  $\alpha 1$  chain.  $\alpha 1$  Lys2119 (orange sticks) forms cross-links with  $\alpha 1$  Lys2288,  $\alpha 1$  Lys2451,  $\alpha 1$  Lys2467 and  $\alpha 1$  Lys2486 (orange  $C\alpha$  spheres). **(B)** Cross-links between the laminin  $\gamma 1$  tail and the  $\alpha 1$  chain.  $\gamma 1$  Lys1606 (magenta filled circle adjacent to the last resolved residue of  $\gamma 1$  chain, Glu1605) forms cross-links with  $\alpha 1$  Lys2277 and  $\alpha 1$  Lys2467 (magenta spheres).

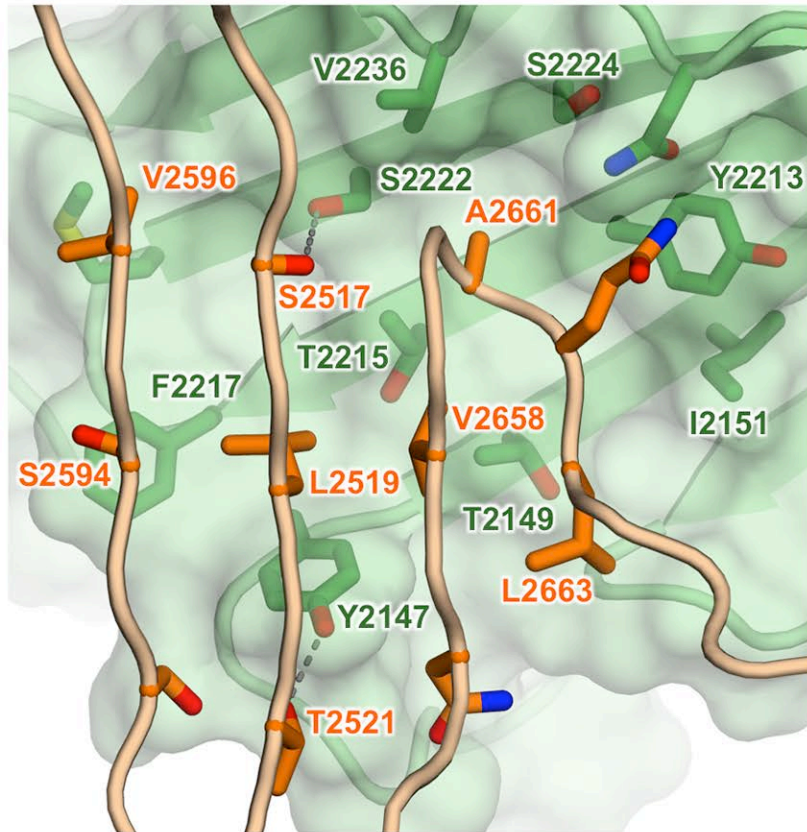

**Figure S2, related to Figure 3. The LG1-LG3 interface in laminin-111 mini-E8.** LG1 is shown as a transparent green surface, and LG3 is shown in orange.
